# Supplementary material for: Human Umbilical Cord Lining-Derived Epithelial Cells: A Potential Source of Non-Native Epithelial Cells That Accelerate Healing in a Porcine Cutaneous Wound Model
Source: MDPI journal article supplement (doi:10.3390/ijms23168918), 2022-08-10
Supplement: s1 [file s1]

**Human umbilical cord lining-derived epithelial cells:**

**A potential source of non-native epithelial cells that accelerate healing in a porcine cutaneous wound model**

**Kua et al.**

## Supplementary Figures:

a)

### Human skin keratinocytes (KCs) - Passage 3

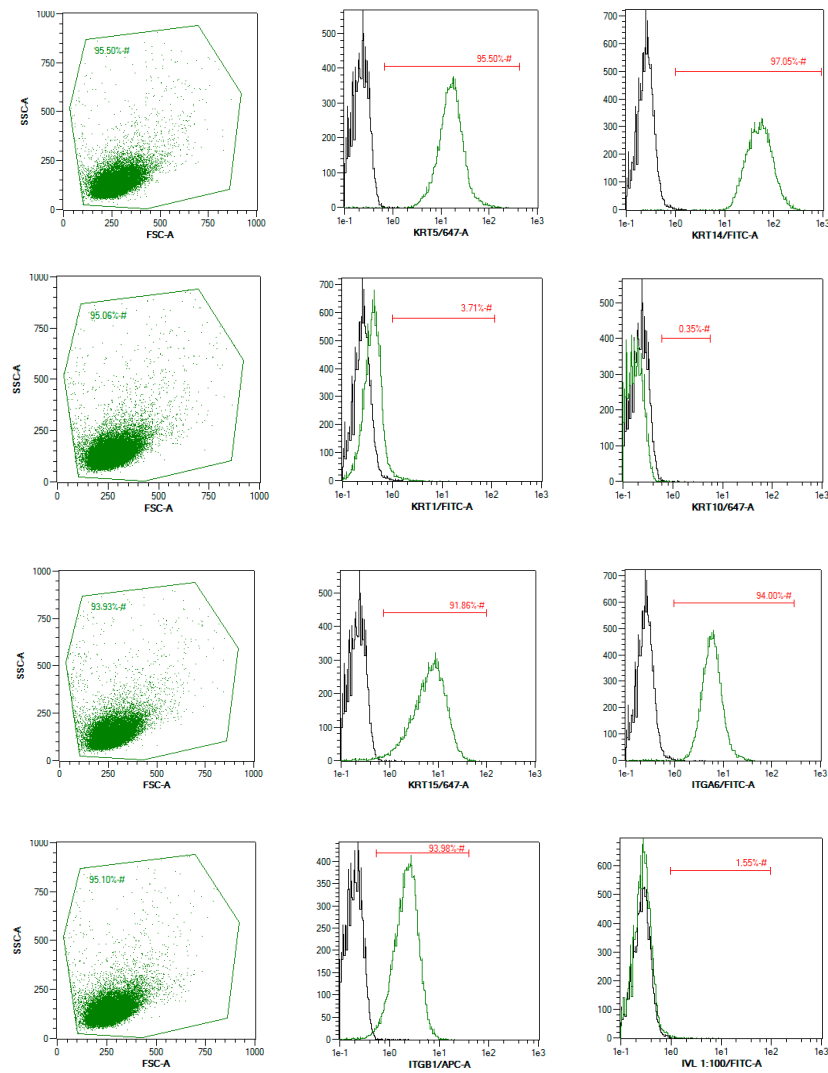

**Supplementary Figure S1(a).** Representative flow cytometric analyses of skin keratinocytes stained with various known basal-, differentiated- and cell adhesion markers for human epithelial cells

**b) Human umbilical cord lining epithelial cells (CLECs) – Passage 3**

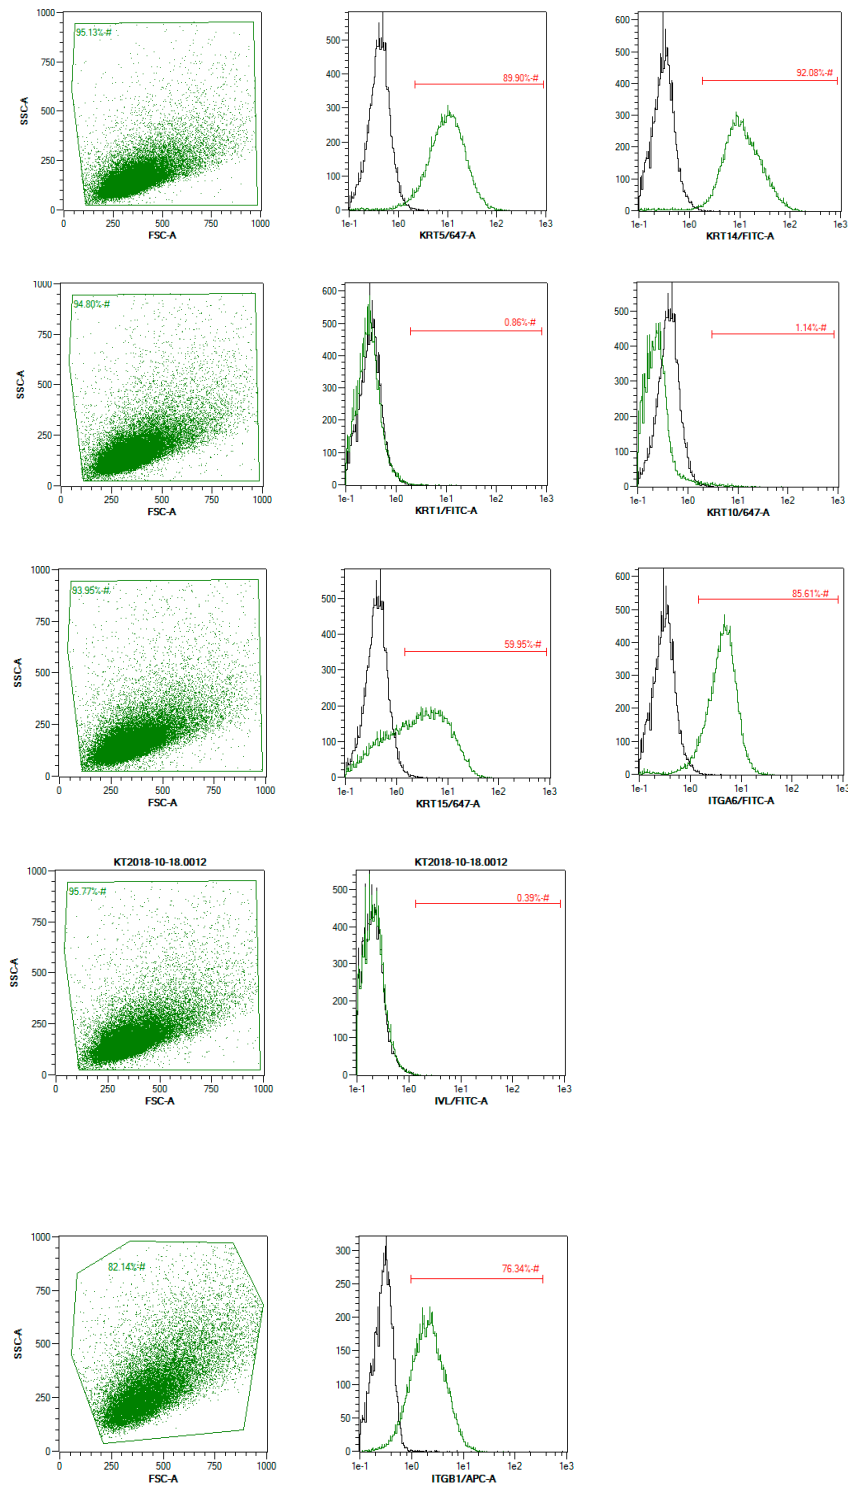

**Supplementary Figure S1(b).** Representative flow cytometric analyses of umbilical cord lining epithelial cells stained with various known basal-, differentiated- and cell adhesion markers for human epithelial cells

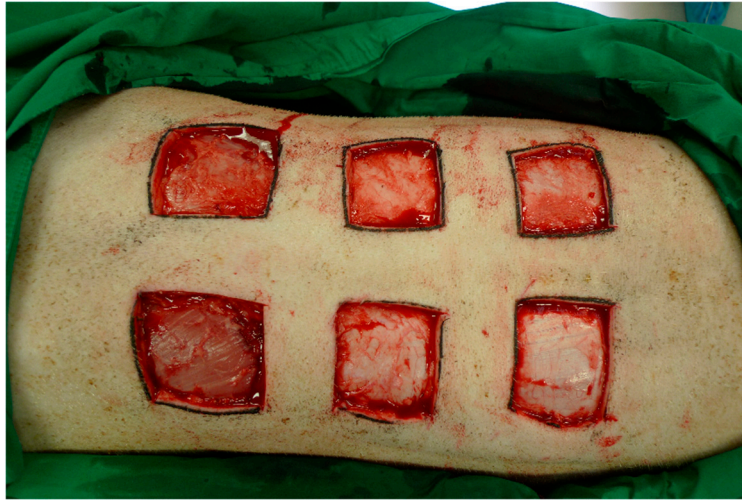

**Supplementary Figure S2:** Porcine full thickness excisional wound model with 6 full thickness excisional wounds (5cm by 5cm) created on the dorsal area of each Yorkshire pig.

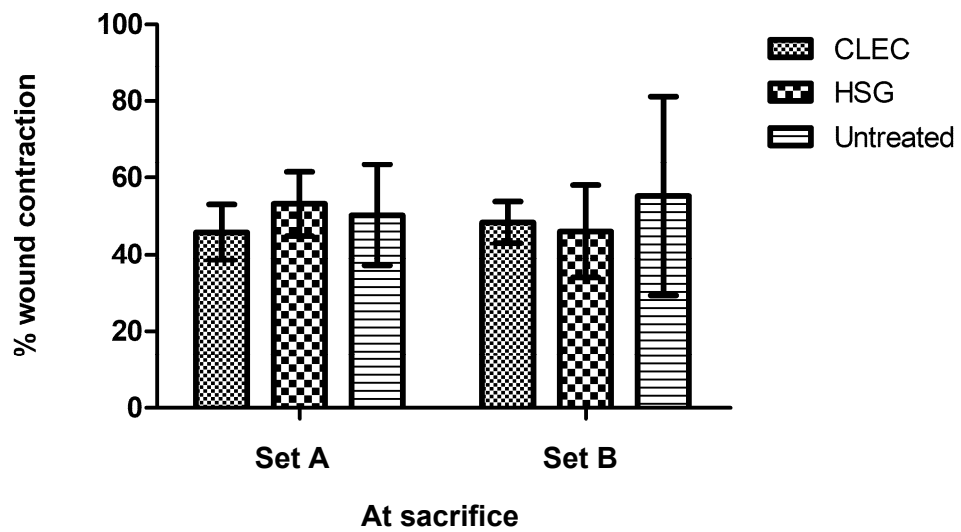

**Supplementary Figure S3:** Percentage wound contraction represented by mean  $\pm$  SD based on the tattooed area boundaries (when the animal was euthanised) with respect to the original tattooed area during wound creation on the porcine model. The three treatment arms compared were CLEC, HSG and standard dressings (“untreated”). Statistical analysis was performed using one-way ANOVA – Bonferroni’s Multiple Comparison Test and there was no significant difference between each treatment arm for the two sets studied.

**Supplementary Table S1.** Tissues and tissue-derived cells used for the experiments

| Keratinocytes from foreskin |     |        | Epithelial cells from umbilical cord tissue lining |        |
|-----------------------------|-----|--------|----------------------------------------------------|--------|
| Donor ID                    | Age | Gender | Donor ID                                           | Gender |
| KC #009                     | 6   | M      | CLEC #030                                          | M      |
| KC #015                     | 3   | M      | CLEC #031                                          | F      |
| KC #020                     | 6   | M      | CLEC #032                                          | F      |
| KC #021                     | 7   | M      | CLEC #044                                          | M      |

**De-identified skin grafts and dermal fibroblasts from the Singapore General Hospital Skin Bank Unit**

| Tissue ID | Specimen Type                         |
|-----------|---------------------------------------|
| #11002    | Cryopreserved human skin allografts   |
| #NFTST09  | Cryopreserved dermal skin fibroblasts |

**Supplementary Table S2.** List of antibodies used in this study, related to Figure 1, Supplementary Figure S1 and Figures 2b-c.

| Antibodies                                    | Source            | Catalog number | Dilution           |
|-----------------------------------------------|-------------------|----------------|--------------------|
| Alexa-Fluor 647- conjugated KRT5              | Abcam             | ab193895       | 1:400 IF; 1:200 FC |
| FITC- conjugated KRT14(clone LL002)           | Abcam             | ab77684        | 1:100 IF; 1:100 FC |
| KRT1 (clone LHK1)                             | Abcam             | ab81623        | 1:100 IF; 1:200 FC |
| Alexa- Fluor 647 conjugated KRT10             | Abcam             | Ab194231       | 1:100 IF; 1:100 FC |
| KRT15 (Clone EPR1614Y)                        | Abcam             | Ab52816        | 1:100 IF; 1:50 FC  |
| IVL(clone SY5)                                | Abcam             | Ab68           | 1:50 IF only       |
| IVL (SY5)                                     | Novus Biologicals | NBP2-34264     | 1:100 FC only      |
| FITC-conjugated CD49f ( <i>ITGA6</i> )        | BD Pharmingen     | 555735         | 1:20 IF; 1:50 FC   |
| APC-conjugated CD29 ( <i>ITGB1</i> )          | BD Pharmingen     | 559883         | 1:20 IF; 1:50 FC   |
| p63 (Clone 4A4)                               | Santa Cruz        | Sc-8431        | 1:20 IF; 1:100 FC  |
| Mouse IgG2a,monoclonal (FITC) Isotype control | Abcam             | Ab81197        | 1:100              |
| Alexa-Fluor 488- conjugated goat anti-rabbit  | Life Technologies | A11008         | 1:1000             |
| Alexa- Fluor 488-conjugated goat anti-mouse   | Life Technologies | A11001         | 1:1000             |
| Alexa-Fluor 647- conjugated goat anti-rabbit  | Life Technologies | A21245         | 1:1000             |

IF: Immunofluorescence; FC: Flow cytometry
